# Supplementary material
Source: Research Square preprint supplement (doi:10.21203/rs.3.rs-8033447/v1)
Supplement: Supplementary file 1 [file 0917e1d19bd3eaba22a24a0d.docx]

Appendix A　 Japanese version of the Psychological Preparedness for Disaster Threat Scale (Japanese)

災害に対する心理的備え尺度日本語版

ここでは、激しい台風や暴風雨に関する警報が出されたときや、実際に台風などの深刻な気象状況に直面したとき、あなたがどのように考えたり、感じたり、反応したりするかについてお聞きします。慎重かつ率直に回答してください。すべての項目に回答をお願いします。答えに正解があるわけではありません。「ほとんどの人」がどう回答するかではなく、「あなた自身」の考えについて教えてください。

1. 台風が上陸する可能性を見積もることができる。
2. 台風の季節には、ニュースや気象庁の情報を定期的に確認している。
3. 深刻な気象状況において、自分がすべきことや取るべき対応を分かっているという自信がある。
4. 気象警報が発表された時、激しい台風や暴風雨に備えるための防災資料やグッズの場所を簡単に探し当てることができる。
5. 迫り来る台風や暴風雨の季節に備えて、自宅を安全に保つための準備方法を知っている。
6. 深刻な気象状況において、緊急連絡先の情報をすぐに確認できるところを知っている。
7. 激しい台風や暴風雨の備えとして、自分が利用できる防災資料やグッズについて詳しい。
8. 非常に激しい台風や暴風雨の状況で安全に過ごすために、家庭でどのような備えが必要かを知っている。
9. 台風や暴風雨が近づいてくるときの気象の兆候に詳しい。
10. 気象の非常事態が予想される場合に、自宅や職場で気をつけるべきことを知っている。
11. 災害への警戒を呼び掛ける防災気象情報について詳しい。
12. 台風に関する警報と注意報の違いを知っている。
13. 非常に激しい台風や暴風雨が自宅に与えうる影響について理解している。
14. ストレスの多い状況に直面した際、自分の力で対処できる自信がある。
15. 激しい台風や暴風雨の状況において、自分の不安や恐怖に対処することができるだろう。
16. つらく困難な状況において、自分の気持ちをうまくコントロールできると思う。
17. 必要なときには、困難な状況を乗り切るために自問自答したり、自分を励ましたりすることができる。
18. つらい状況でも、たいていの場合は冷静沈着に過ごせるだろう。
19. 激しい台風や暴風雨の状況において、どのような対処をすれば自分を落ち着かせることができるかを知っている。
20. 激しい台風や暴風雨に遭遇しても、その状況で生じる自分の反応への対処方法が分かるだろう。
21. 周囲の人が苦境に立たされているのかどうかをすぐに見定めることができるだろう。
22. ほかの人が苦境に立たされていたら、どのようにしてその人を落ち着かせればよいか分かるだろう。
23. 激しい台風や暴風雨に関する警報が出ている状況において、どのような対処をすればほかの人を落ち着かせることができるかを知っている。
24. 困難な状況において、自分の気持ちを正確に把握できる。
25. 激しい台風や暴風雨の最中に、自分が不安やストレスを感じているかどうかに気づくだろう。
26. つらい状況やストレスの多い状況になった場合に備えて、普段から心の準備をしている。

外的環境に関する知識と調整→1,2,4,5,6,7,8,9,10.11.12.13

感情的・心理的反応の調整→14,15,16,17,18,19,20,24

社会的環境の調整→21,22,23

削除→3,25,26

選択肢

全く当てはまらない

あまり当てはまらない

やや当てはまる

とても当てはまる
